# Supplementary material
Source: PubMed Central journal article supplement (PMC5238951)
Supplement: NIHMS71068-supplement-Supplemental_Information.pdf [file NIHMS71068-supplement-Supplemental_Information.pdf]

# Supporting Information

## Are coarse-grained models apt to detect protein thermal stability? The case of OPEP force field.

Maria Kalimeri<sup>a</sup>, Philippe Derreumaux<sup>a,b</sup>, Fabio Sterpone<sup>a,\*</sup>

<sup>a</sup>Laboratoire de Biochimie Théorique, IBPC, CNRS, UPR9080, Univ. Paris Diderot, Sorbonne Paris Cité, France

<sup>b</sup>Institut Universitaire de France, 103 Boulevard Saint-Michel, 75005, Paris, France.

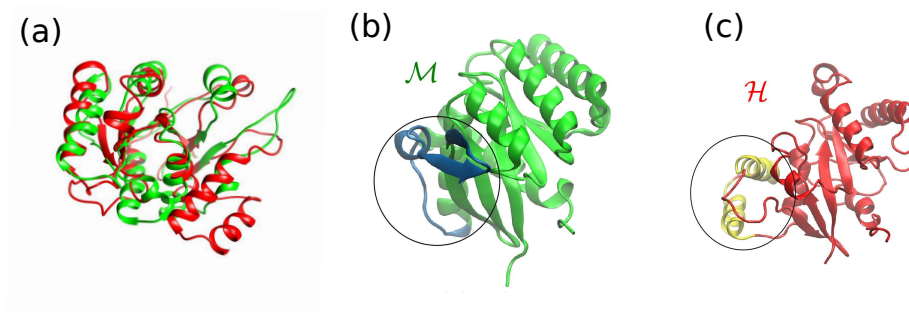

Figure 1: G-domains of Ef-Tu and -1a. (a) Overlap of the two homologues,  $\mathcal{M}$  in green and  $\mathcal{H}$  in red, (b) mesophilic homologue with the switch I region highlighted in blue and (c) hyperthermophilic homologue with the switch I region highlighted in yellow.

---

\*Corresponding author

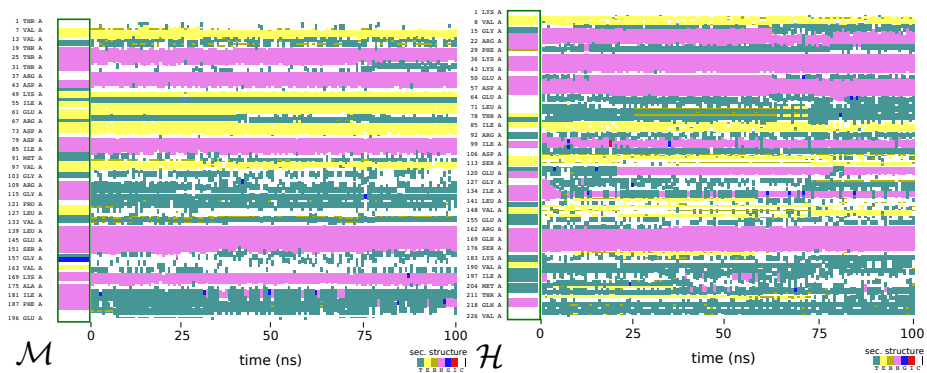

Figure 2: Secondary structure timeline for the 100ns OPEP simulation at ambient temperatures. The mesophilic system is on the left and the thermophilic one on the right. At the beginning of each timeline, in a green-bordered box the secondary structure of the crystal structure is also reported.

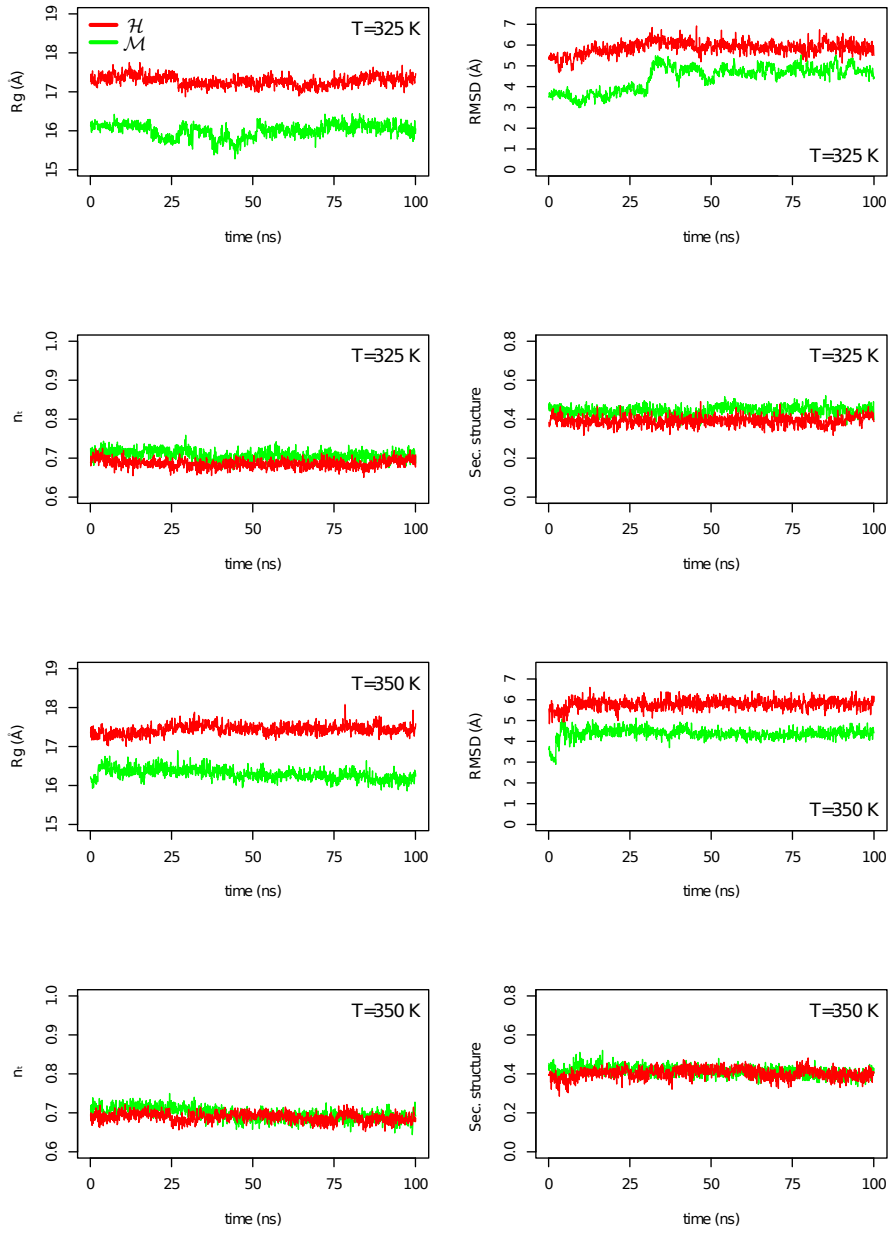

Figure 3: Timeline of radius of gyration  $R_g$ , rigid-core  $C_\alpha$  RMSD, fraction of native torsion angles  $n_t$  and fraction of secondary structure for the two independent OPEP simulations at 325 K (top) and 350 K (bottom).
